# Supplementary material
Source: Research Square preprint supplement (doi:10.21203/rs.3.rs-9888470/v1)
Supplement: Supplementary file 1 [file 830c567cdc758b209eda664c.docx]

**Part I Questions related to organizational culture dimensions**

- **Direction:** Please indicate your degree of agreement/disagreement with the following statements by making (X) mark on the appropriate cell.

**Key: SDA, strongly disagree; DA, Disagree N, Neutral A, Agree SA, strongly agree.**

| ***Innovation and risk-taking*** | ***SDA*** | ***DA*** | ***N*** | ***A*** | ***SA*** |
| --- | --- | --- | --- | --- | --- |
| 1. Innovation is important for the success of our organization |  |  |  |  |  |
| 2. I feel encouraged to take risks in my work in order to innovate and improve processes |  |  |  |  |  |
| 3. Our organization provides resources and support for employees to experiment with new ideas and approaches |  |  |  |  |  |
| 4. I feel that my ideas for innovation are valued and taken seriously by my colleagues and superiors |  |  |  |  |  |
| 5. Our organization is willing to take calculated risks in order to stay ahead of the competition and drive growth |  |  |  |  |  |
| ***Attention to detail*** | ***SDA*** | ***DA*** | ***N*** | ***A*** | ***SA*** |
| 1. Attention to detail is important in my work |  |  |  |  |  |
| 2. I double-check my work to ensure accuracy and completeness |  |  |  |  |  |
| 3. My colleagues and superiors value attention to detail in their work |  |  |  |  |  |
| 4. I review instructions and guidelines to ensure that I am following them correctly |  |  |  |  |  |
| 5. Attention to detail is a key factor in achieving high-quality work |  |  |  |  |  |

| ***Outcome orientation*** | ***SDA*** | ***DA*** | ***N*** | ***A*** | ***SA*** |
| --- | --- | --- | --- | --- | --- |
| 1. I am focused on achieving outcomes and results in my work |  |  |  |  |  |
| 2. I set specific goals and objectives for my work to ensure that I am achieving the desired outcomes |  |  |  |  |  |
| 3. My colleagues and superiors value achieving outcomes and results in their work |  |  |  |  |  |
| 4. I track and measure progress towards achieving outcomes and results in my work |  |  |  |  |  |
| 5. Achieving outcomes and results is a key factor in determining success in my work |  |  |  |  |  |
| ***People orientation*** | ***SDA*** | ***DA*** | ***N*** | ***A*** | ***SA*** |
| 1. I enjoy working with and helping people in my work |  |  |  |  |  |
| 2. I actively seek feedback from others to enhance my work and strengthen my relationships with colleagues |  |  |  |  |  |
| 3. My colleagues and superiors value building positive relationships with others in their work |  |  |  |  |  |
| 4. I collaborate with others to achieve common goals and objectives. |  |  |  |  |  |
| 5. Building positive relationships with others is a key factor in achieving success in my work |  |  |  |  |  |
| ***Team orientation*** | ***SDA*** | ***DA*** | ***N*** | ***A*** | ***SA*** |
| 1. I enjoy working collaboratively with others in a team environment |  |  |  |  |  |
| 2. I actively seek out opportunities to work with others in a team setting |  |  |  |  |  |
| 3. My colleagues and superiors value working effectively in a team environment |  |  |  |  |  |
| 4. I contribute to team discussions and decision-making processes |  |  |  |  |  |
| 5. Working effectively in a team is a key factor in achieving success in my work |  |  |  |  |  |

| ***Aggressiveness*** | ***SDA*** | ***DA*** | ***N*** | ***A*** | ***SA*** |
| --- | --- | --- | --- | --- | --- |
| 1. I believe that being competitive is necessary to succeed in my work |  |  |  |  |  |
| 2. I feel the need to assert my dominance or authority over others in a work setting |  |  |  |  |  |
| 3. I believe that being aggressive is necessary to get ahead in my career |  |  |  |  |  |
| 4. I engage in confrontational behavior with colleagues or superiors |  |  |  |  |  |
| 5. I believe that being competitive can sometimes lead to negative consequences in the workplace |  |  |  |  |  |
| ***Stability*** | ***SDA*** | ***DA*** | ***N*** | ***A*** | ***SA*** |
| 1. I am able to handle stressful situations in the workplace |  |  |  |  |  |
| 2. I feel overwhelmed or anxious at work |  |  |  |  |  |
| 3. I am able to maintain a consistent level of productivity and focus throughout the workday |  |  |  |  |  |
| 4. I feel emotionally stable and in control of your emotions at work |  |  |  |  |  |
| 5. I am able to adapt to changes in the workplace without feeling overwhelmed or stressed |  |  |  |  |  |

**Part II Questions related to organizational performance**

|  | **Dimensions** | **1** | **2** | **3** | **4** | **5** |
| --- | --- | --- | --- | --- | --- | --- |
| **#** | *Customer perspective* | | | | | |
| 1 | I have observed that CBE customers are satisfied with the CBE services delivery. |  |  |  |  |  |
| 2 | I have observed that CBE customers increased. |  |  |  |  |  |
| 3 | The CBE culture result in an increase in revenues |  |  |  |  |  |
| 4 | The factory culture result in a decrease in costs |  |  |  |  |  |
|  | *Finance Perspective* | | | | | |
| 5 | I have observed that CBE revenue increased. |  |  |  |  |  |
| 6 | I have observed that the CBE revenue leakage decreased. |  |  |  |  |  |
| 7 | I have observed that the Bank resource utilization improved. |  |  |  |  |  |
|  | *Internal process perspective* | | | | | |
| 8 | I have observed that the Bank service accessibility improved. |  |  |  |  |  |
| 9 | I have observed that the Bank communication and branding activities are improved. |  |  |  |  |  |
| 10 | I have observed that the Bank product and services portfolio increased. |  |  |  |  |  |
| 11 | I have observed that the Bank service quality increased. |  |  |  |  |  |
| 12 | I have observed that the Bank fraud prevention performance has been enhanced. |  |  |  |  |  |
| 13 | I have observed that the Bank infrastructure and information systems security has been enhanced. |  |  |  |  |  |
|  | *Learning and Development* | | | | | |
| 14 | I have observed that the Bank corporate culture has been improved. |  |  |  |  |  |
| 15 | I have observed that the Bank employee satisfaction has been improved. |  |  |  |  |  |
| 16 | I have observed that the Bank performance in deployment and utilization latest technologies has been improved. |  |  |  |  |  |
| 17 | I have observed that the Bank organizational process and structures has been improved. |  |  |  |  |  |
| 18 | I have observed that the Bank performance in building the staffs’ capacity has been improved. |  |  |  |  |  |
| 19 | I have observed that the Bank performance in building the management capacity has been improved. |  |  |  |  |  |
